# Supplementary material for: Lead-free halide perovskites for high-performance thin-film flexible supercapacitor applications
Source: Royal Society of Chemistry journal article supplement (doi:10.1039/d3tc02784h), 2023-11-27
Supplement: d3tc02784h1.pdf [file d3tc02784h1.pdf]

*Supplementary Information*

# **Lead-free halide perovskites for high-performance thin-film flexible supercapacitor application**

Ankur Yadav<sup>†</sup>, Ankush Saini<sup>†</sup>, Praveen Kumar<sup>‡</sup> and Monojit Bag<sup>†,‡,\*</sup>

<sup>†</sup> Advanced Research in Electrochemical Impedance Spectroscopy Laboratory, Indian Institute of Technology Roorkee, Roorkee 247667, India

<sup>‡</sup> Centre for Nanotechnology, Indian Institute of Technology Roorkee, Roorkee 247667, India

Corresponding authors: (Monojit Bag) [monojit.bag@ph.iitr.ac.in](mailto:monojit.bag@ph.iitr.ac.in),

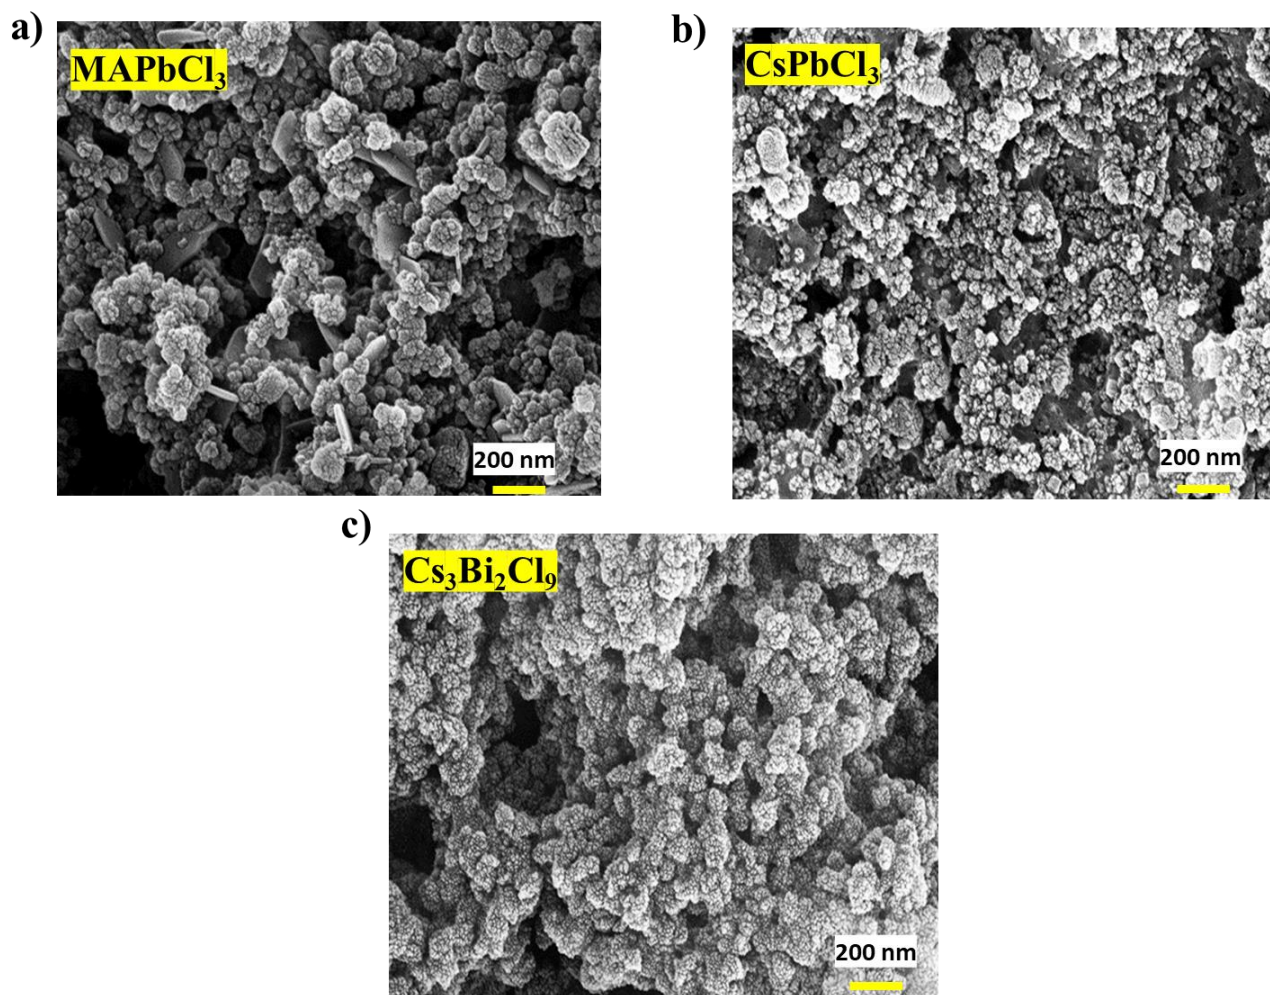

Figure S1: FeSEM Image of synthesized powder a) MAPbCl<sub>3</sub> b) CsPbCl<sub>3</sub> c) Cs<sub>3</sub>Bi<sub>2</sub>Cl<sub>9</sub>

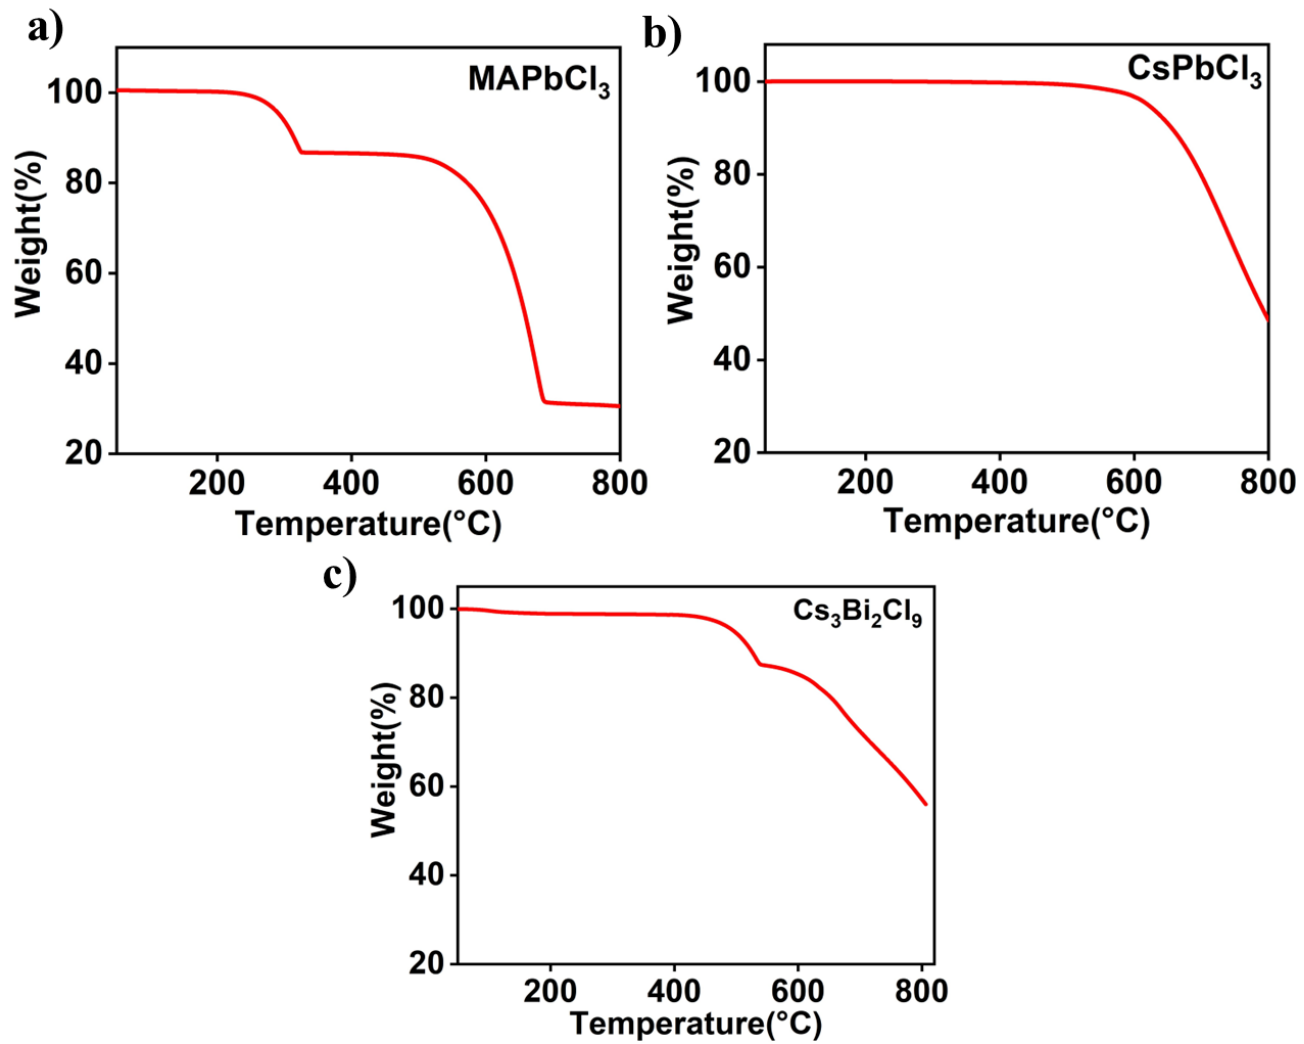

Figure S2: Thermogravimetric Analysis (TGA) curve of a) MAPbCl<sub>3</sub> b) CsPbCl<sub>3</sub> c) Cs<sub>3</sub>Bi<sub>2</sub>Cl<sub>9</sub>

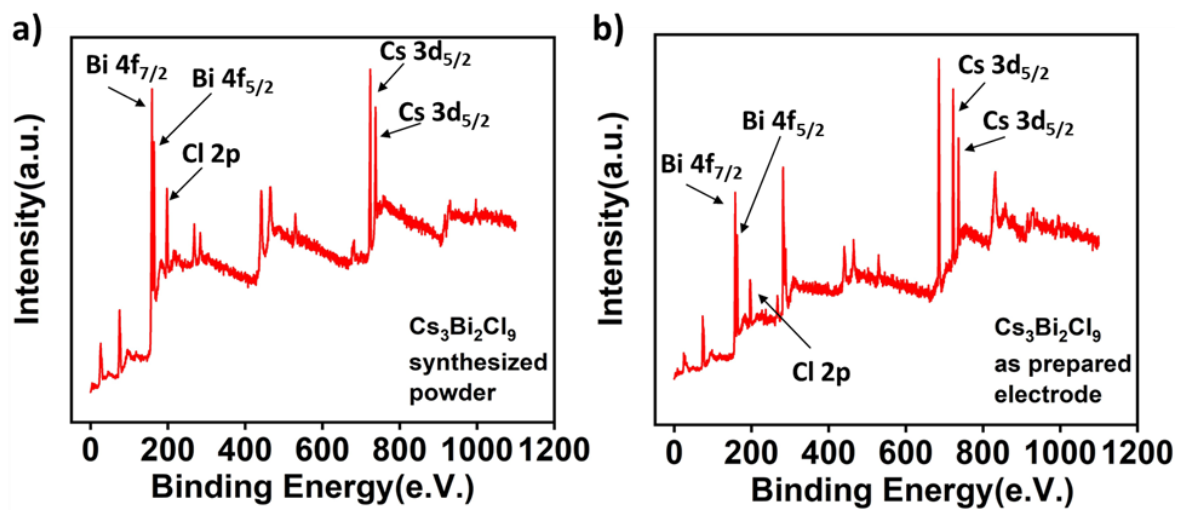

Figure S3: Full scan XPS spectra a)  $\text{Cs}_3\text{Bi}_2\text{Cl}_9$  synthesized powder b)  $\text{Cs}_3\text{Bi}_2\text{Cl}_9$  as prepared electrode

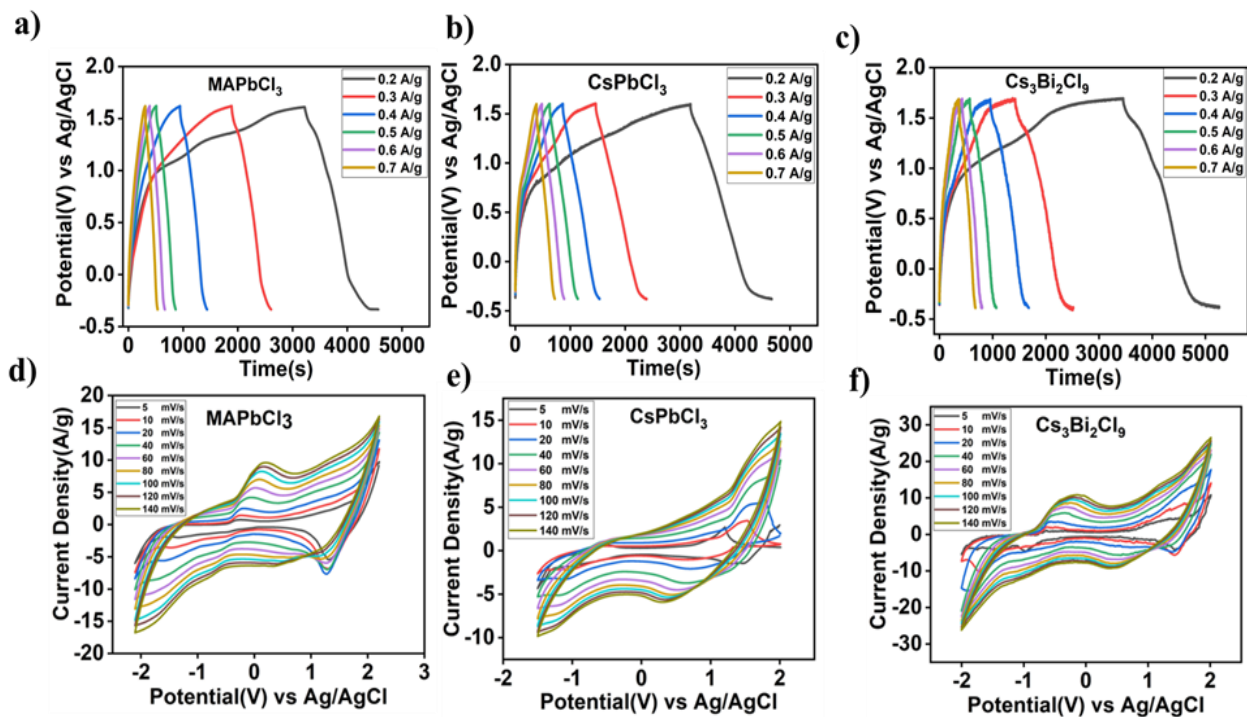

Figure S4: Galvanostatic Charge Discharge (current density range- 0.2 A/g to 0.7 A/g) and Cyclic Voltammetry curve (scan rate range- 5 mV/s to 140 mV/s) in three electrode system for a,d) MAPbCl<sub>3</sub> b,e) CsPbCl<sub>3</sub> c,f) Cs<sub>3</sub>Bi<sub>2</sub>Cl<sub>9</sub> electrodes

## Calculation

The **specific capacitance, energy density and power density** can be calculated from the GCD curved by the following relations:

$$\text{Specific Capacitance, } C_s \text{ (F/g)} = I \int V \cdot dt / mV^2 \quad S1$$

$$\text{Energy Density (Wh/kg) , } E = C_s(\Delta V)^2 / 7.2 \quad S2$$

$$\text{Power Density (W/kg) , } P = E \times 3600/t \quad S3$$

Here, I is the current (A), V is the potential window (Volt), m is mass of active material (g), and t is the discharging time.

In case of CV following relation can be used to calculate the specific capacitance:

$$C_s(\text{F/g}) = A''/m * s * \Delta V \quad S4$$

Where A'' is the area under CV curve, s is the scan rate(mV/s) and  $\Delta V$  is the voltage window.

In case of two electrode system, the areal capacitance ( $\text{mF/cm}^2$ ) areal energy density ( $\text{Wh/cm}^2$ ) and power density ( $\text{W/cm}^2$ ) can be calculated from following relations:

$$\text{Areal Capacitance, } C_A \text{ (mF/cm}^2) = I \int V \cdot dt / A \cdot V^2 \quad S5$$

$$\text{Areal Energy density, } E_A \text{ (Wh/cm}^2) = C_A (\Delta V)^2 / 7200 \quad S6$$

$$\text{Areal Power density, } P_A \text{ (W/cm}^2) = E_A / t \quad S7$$

Where A is active electrode area and t is discharging time in hours

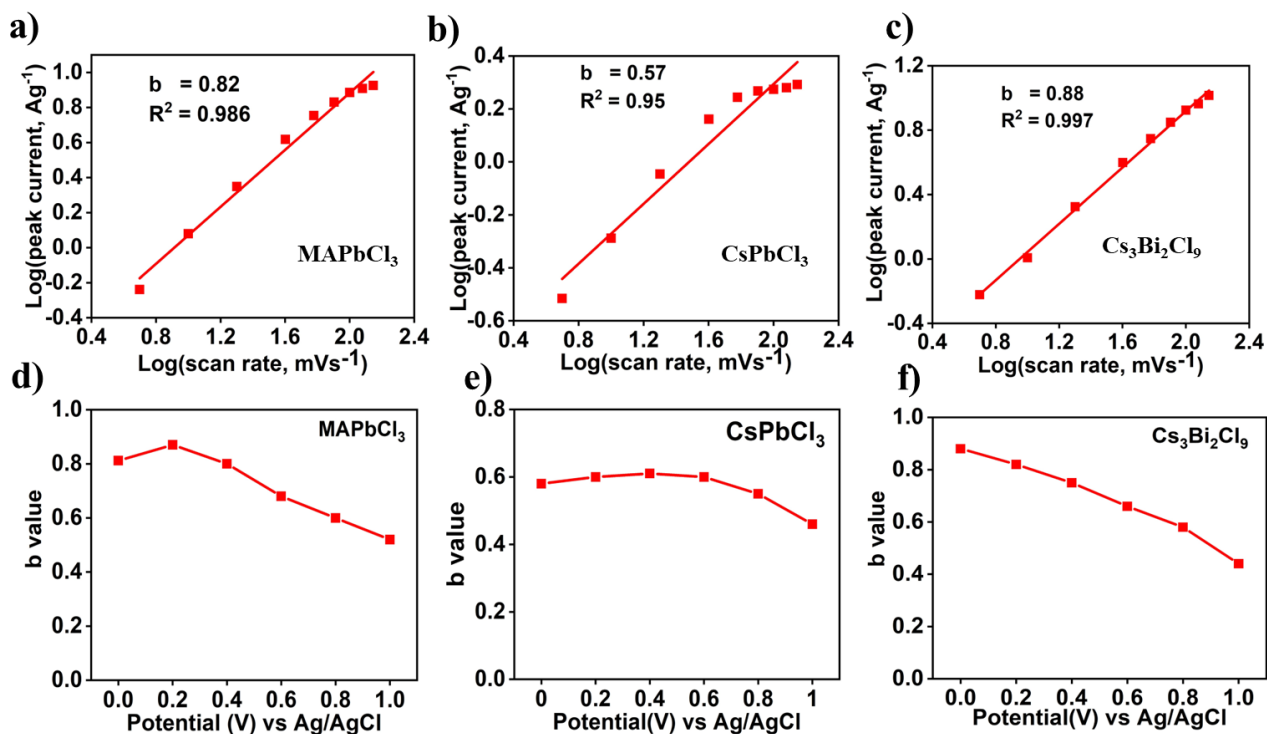

Figure S5: Graph between log peak current v/s log scan rate for b value and variation of b value with applied bias a, d) MAPbCl<sub>3</sub> b,e) CsPbCl<sub>3</sub> c,f) Cs<sub>3</sub>Bi<sub>2</sub>Cl<sub>9</sub> (CV scan rate range- 5mV/s to 100 mV/s)

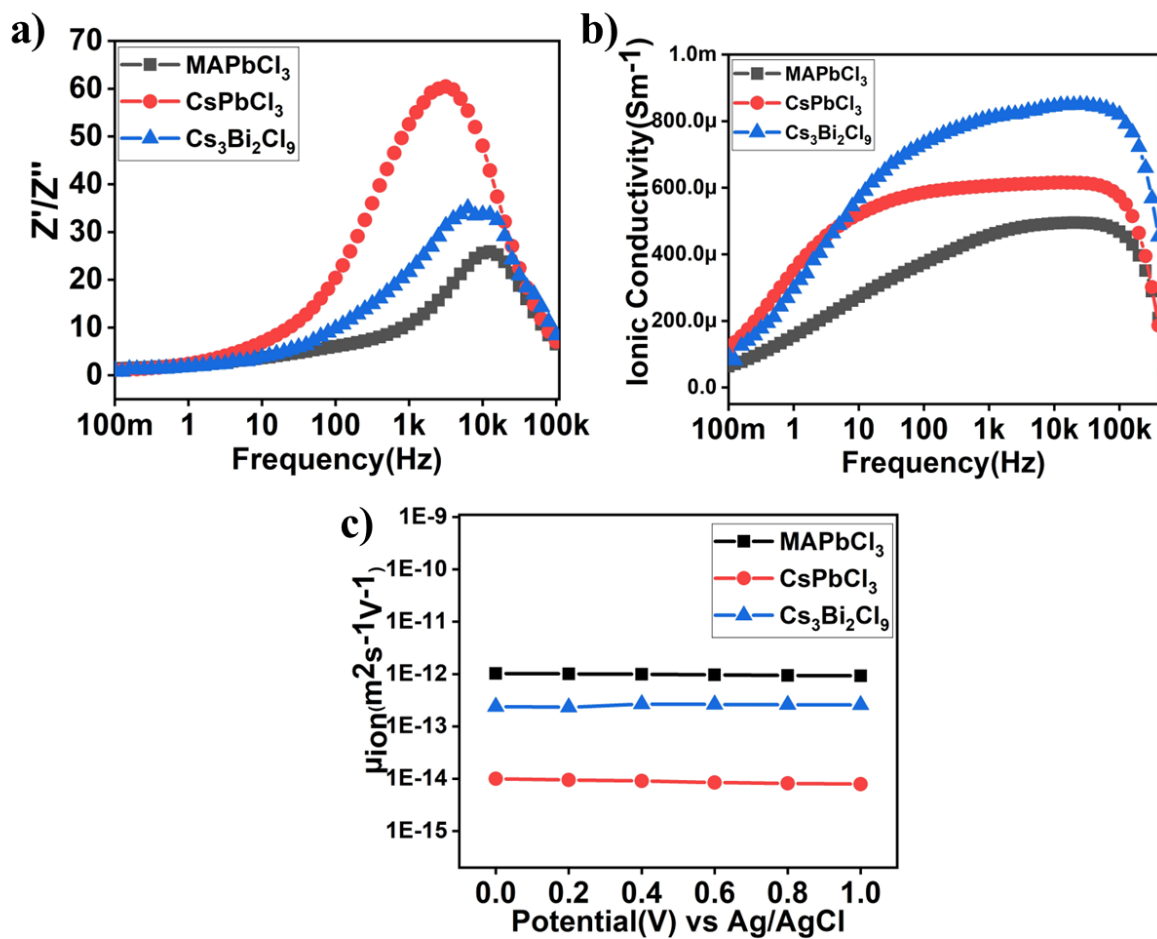

Figure S6: a) Tangent loss plots b) Variation of Ionic mobility with voltage c) Ionic conductivity variation with frequency (Frequency range- 100 mHz to 100 kHz)



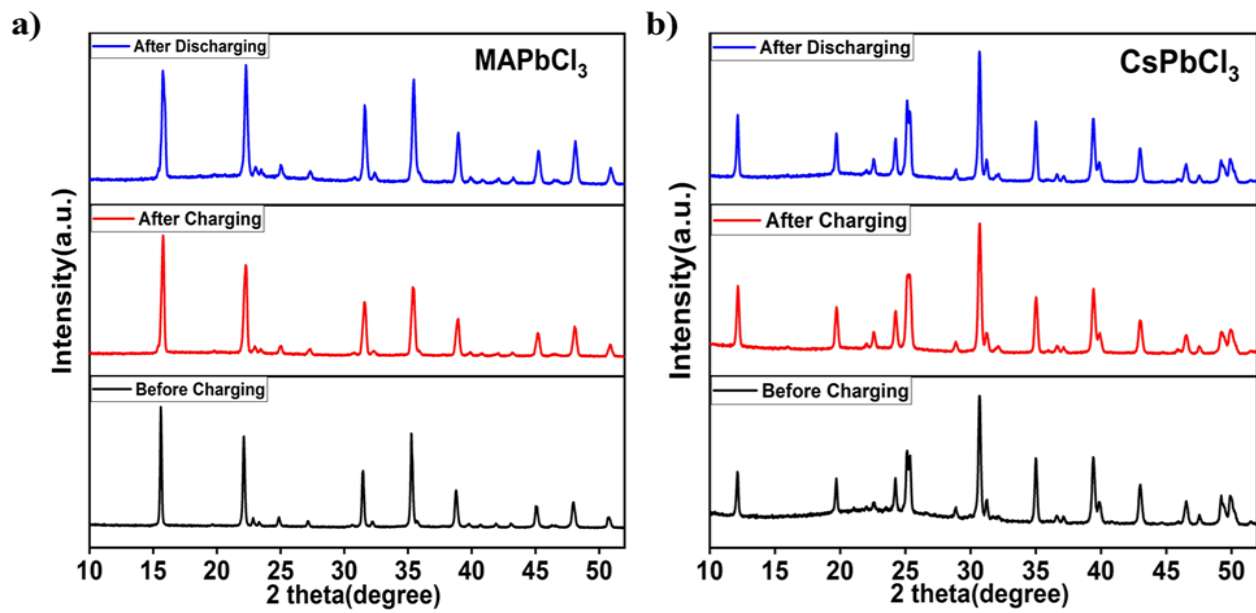

Fig. S7: Ex situ XRD of a) MAPbCl<sub>3</sub> b) CsPbCl<sub>3</sub>

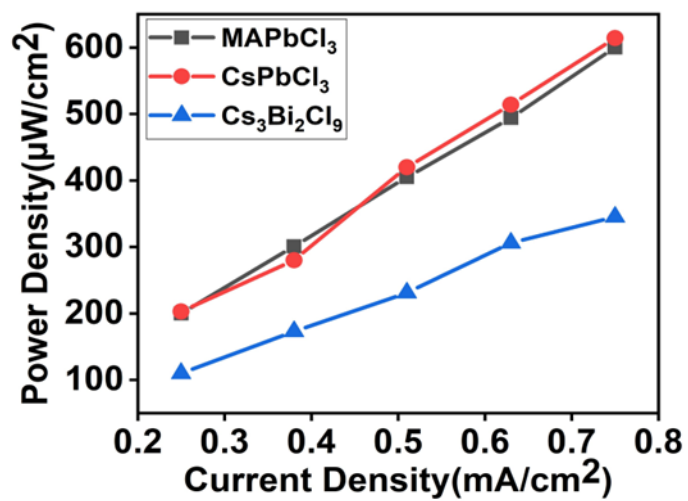

Fig. S8: Power density variation of various perovskite-based supercapacitor devices

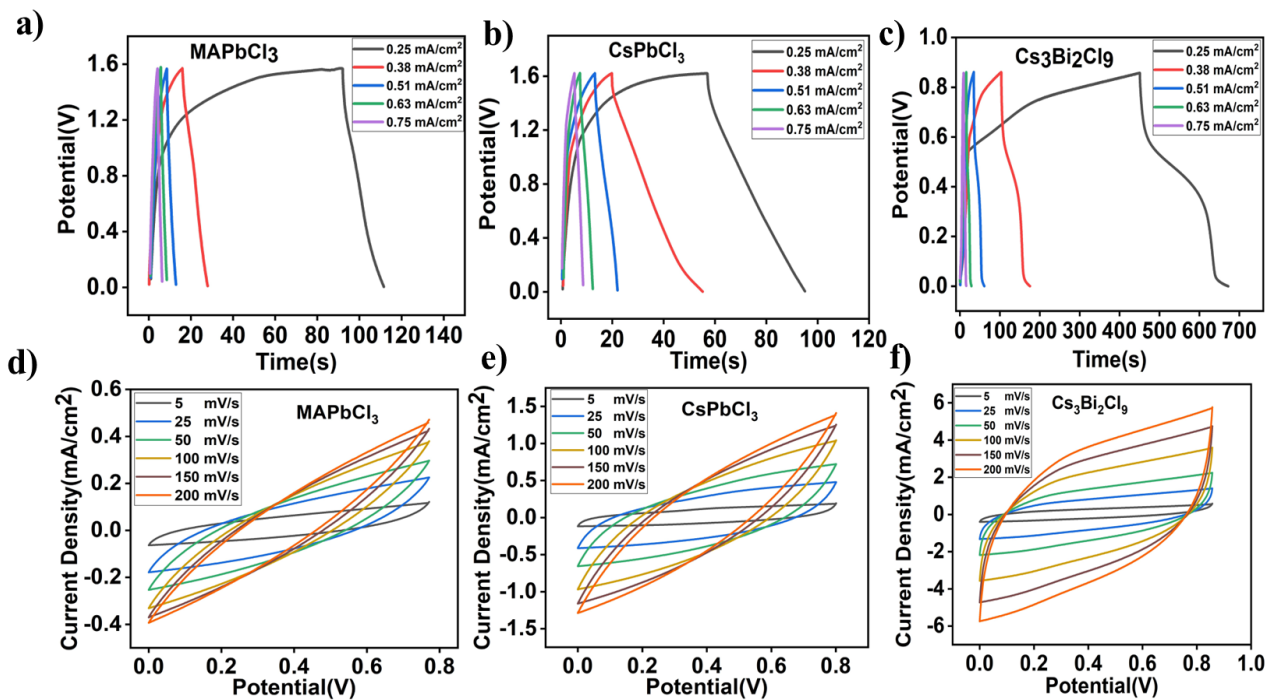

Figure S9: Galvanometric Charge Discharge curve (current density range- 0.25 A/g to 0.75 A/g) and CV curve (scan rate range- 5 mV/s to 200 mV/s) a, d) MAPbCl<sub>3</sub> b, e) CsPbCl<sub>3</sub> c, f) Cs<sub>3</sub>Bi<sub>2</sub>Cl<sub>9</sub>

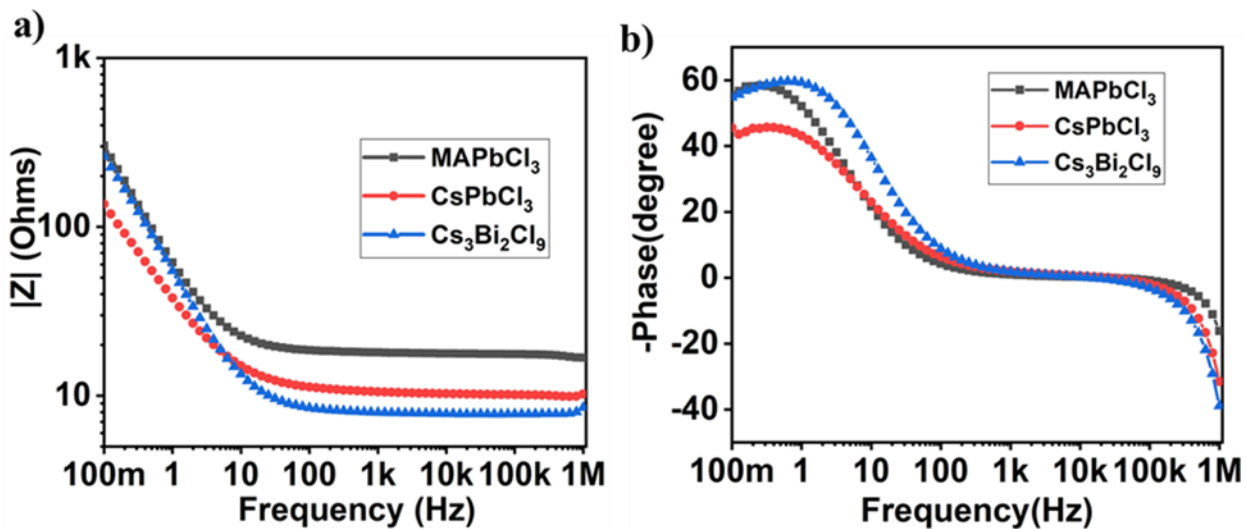

Figure S10: a) Bode magnitude b) Bode phase plot of various supercapacitor devices

**Table S1: Fitting Parameters (linear fitting) for bending angles (Linear stage)**

|                               |                        |
|-------------------------------|------------------------|
| <b>Model</b>                  | <b>Linear</b>          |
| <b>Equation</b>               | $y = a + b \cdot x$    |
| <b>Weight</b>                 | No weighing            |
| <b>Intercept</b>              | <b>99.64143±0.40</b>   |
| <b>Slope</b>                  | <b>-0.03948± 0.004</b> |
| <b>Residual Sum of Square</b> | <b>1.422257</b>        |
| <b>Pearson's r</b>            | <b>-0.97895</b>        |
| <b>R-Square (COD)</b>         | <b>0.95834</b>         |
| <b>Adj. R-Square</b>          | <b>0.94793</b>         |

**Table S2: Fitting Parameters (exponential fit) for bending cycles (Linear Stage)**

|                        |                                       |
|------------------------|---------------------------------------|
| <b>Model</b>           | <b>Exponential</b>                    |
| <b>Equation</b>        | $y = y_0 + A1 \cdot \exp(R0 \cdot x)$ |
| <b>y0</b>              | <b>89.58732 ± 0.56123</b>             |
| <b>A</b>               | <b>10.2067 ± 0.77066</b>              |
| <b>R0</b>              | <b>-0.03267 ± 0.00662</b>             |
| <b>Reduced Chi-Sqr</b> | <b>0.47955</b>                        |
| <b>R-Square (COD)</b>  | <b>0.98321</b>                        |
| <b>Adj. R-Square</b>   | <b>0.97201</b>                        |

**Table S3: Fitting Parameters (linear fitting) for twisting angles (Angular Stage)**

|                               |                      |
|-------------------------------|----------------------|
| <b>Model</b>                  | <b>Linear</b>        |
| <b>Equation</b>               | $y = a + b \cdot x$  |
| <b>Weight</b>                 | No weighing          |
| <b>Intercept</b>              | $100.58 \pm 0.60465$ |
| <b>Slope</b>                  | $-0.11067 \pm 0.008$ |
| <b>Residual Sum of Square</b> | 1.828                |
| <b>Pearson's r</b>            | -0.99181             |
| <b>R-Square (COD)</b>         | 0.98369              |
| <b>Adj. R-Square</b>          | 0.97825              |

**Table S4: Fitting Parameters (exponential fit) for twisting cycles (Angular stage)**

|                        |                                         |
|------------------------|-----------------------------------------|
| <b>Model</b>           | <b>Exponential</b>                      |
| <b>Equation</b>        | $y = y_0 + A_1 \cdot \exp(R_0 \cdot x)$ |
| <b>y0</b>              | $82.10863 \pm 1.84842$                  |
| <b>A</b>               | $16.80643 \pm 1.75487$                  |
| <b>R0</b>              | $-0.01311 \pm 0.00369$                  |
| <b>Reduced Chi-Sqr</b> | 1.15311                                 |
| <b>R-Square (COD)</b>  | 0.98173                                 |
| <b>Adj. R-Square</b>   | 0.96954                                 |

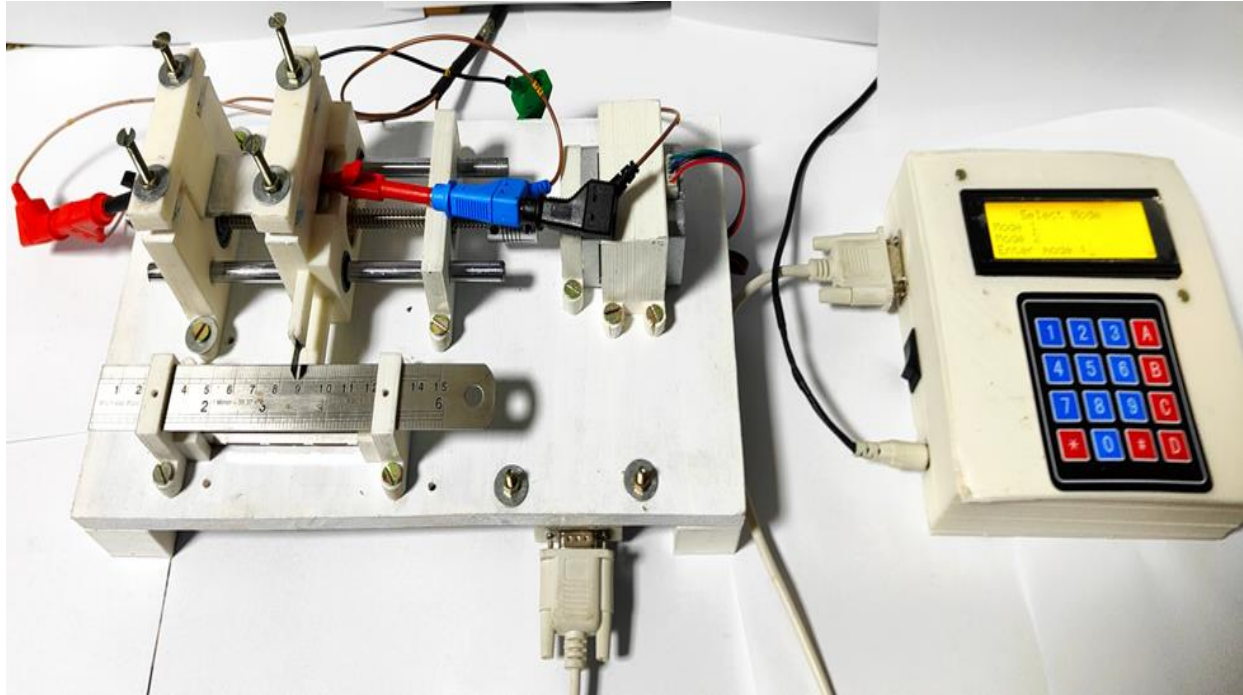

Figure S11: Linear Stage with substrate holder for bending angle and bending cycle measurements

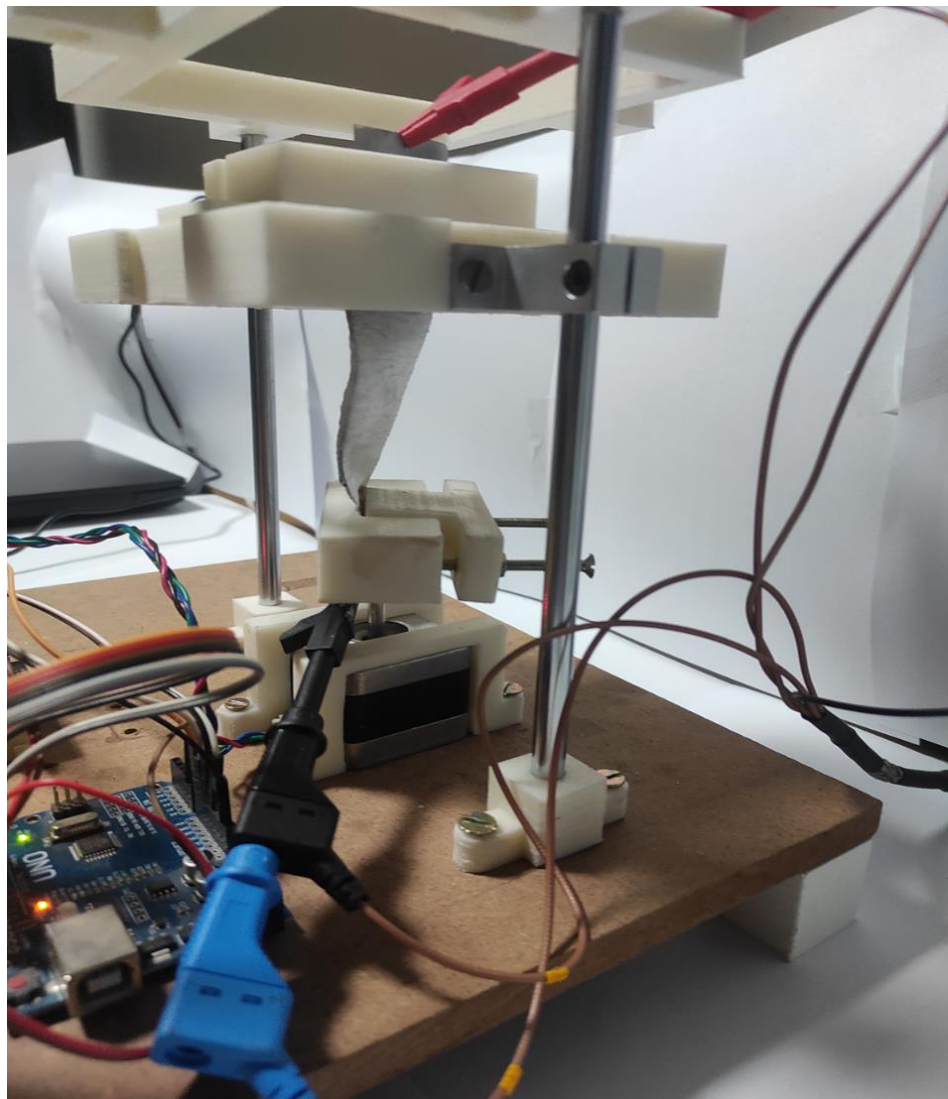

Figure S12: Angular Stage for twisting angle and twisting cycle measurements
